# Supplementary material for: Dissecting the role of Bi and Ba in the catalytic efficiency of VSbBiBa/Al2O3 catalysts in oxidative dehydrogenation and oxidation of propane
Source: Royal Society of Chemistry journal article supplement (doi:10.1039/d3cy00207a), 2023-01-01
Supplement: d3cy00207a1.pdf [file d3cy00207a1.pdf]

## Supplementary Information File

### Dissecting the role of Bi and Ba in the catalytic efficiency of VSbBiBa/Al<sub>2</sub>O<sub>3</sub> catalysts in propane oxidative dehydrogenation

A. Bouzeggane<sup>1</sup>, P.P. Bargiela<sup>1</sup>, M. Aouine<sup>1</sup>, R. Checa<sup>1</sup>, I. Popescu<sup>2</sup>, I.C. Marcu<sup>2</sup>, O.  
Peruch<sup>3</sup>, V. Bellière-Baca<sup>3</sup> and J.M.M. Millet<sup>1</sup>

<sup>1</sup> Univ Lyon, Université Claude Bernard Lyon 1, CNRS, IRCELYON - UMR 5256, 2 Av.  
Albert Einstein, 69626 Villeurbanne, France

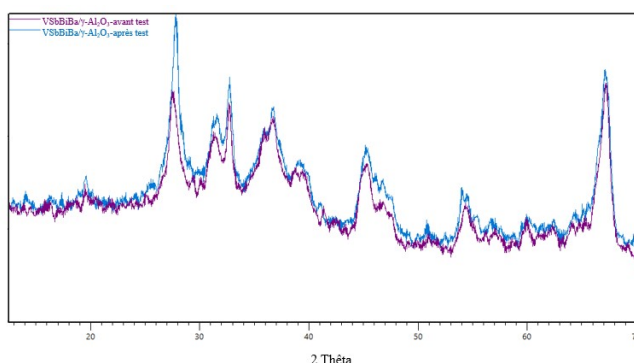

**Figure S1** : X-ray diffractogram of the VSbBiBaO/ $\gamma$ -Al<sub>2</sub>O<sub>3</sub> catalyst before (blue) and after 24 h of catalytic test (purple).

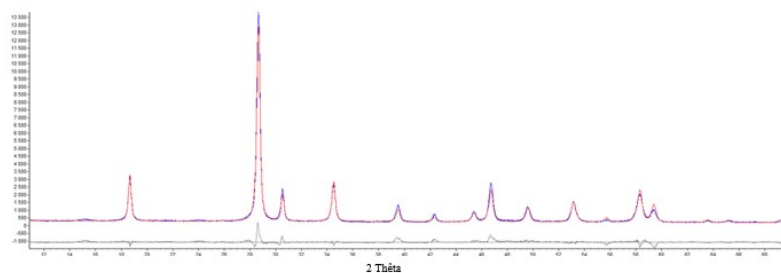

**Figure S2** : Final Rietveld plot for the  $\text{VSb}_{0.9}\text{Bi}_{0.1}\text{O}_4$  sample with in red the observed data and in blue the computed ones; the bottom grey line corresponds to the difference curve.

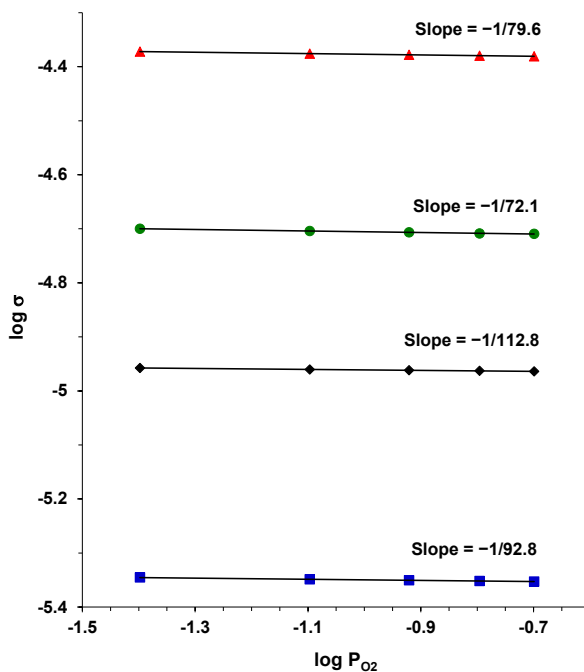

**Figure S3** : Variation of  $\sigma$  as a function of the oxygen pressure for  $\text{VSbO}_4$  ( $\blacklozenge$ ) and  $\text{VBi}_x\text{Sb}_{1-x}\text{O}_4$  samples with  $x = 0.05$  ( $\circ$ ),  $0.08$  ( $\square$ ) and  $0.1$  ( $\otimes$ ), at  $350^\circ\text{C}$  in a log–log plot ( $P_{\text{O}_2}$  in atm;  $\sigma$  in  $\text{ohm}^{-1}\text{cm}^{-1}$ ).

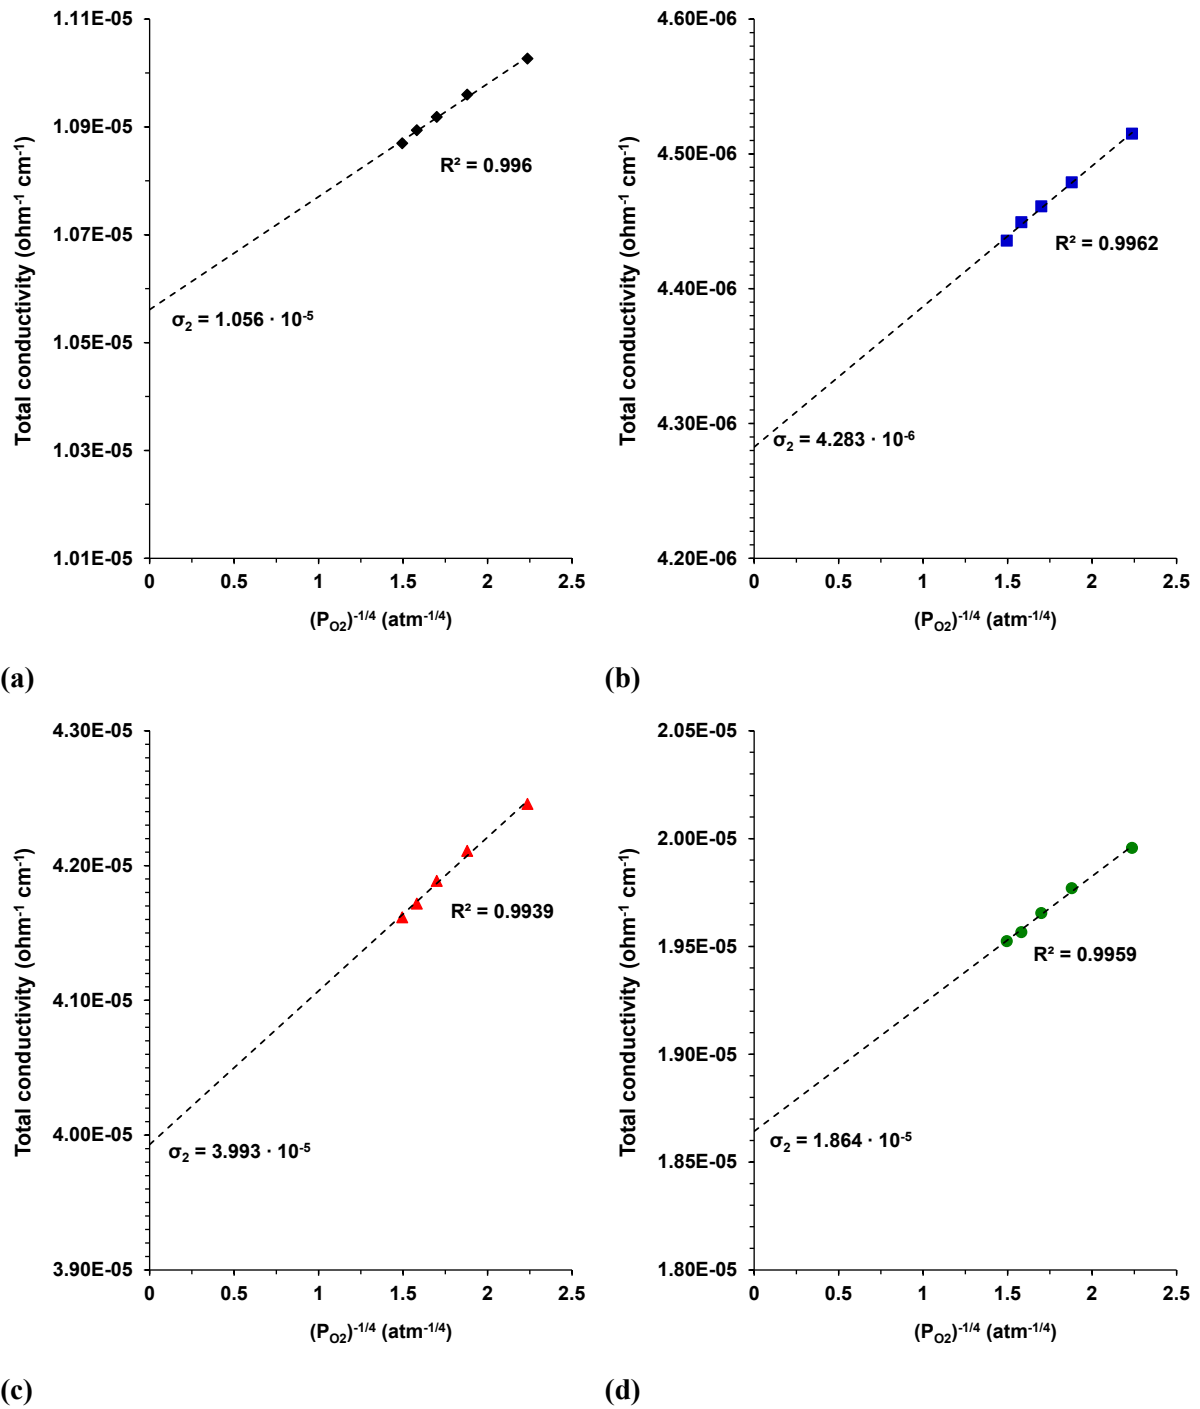

**Figure S4 :** Total conductivity,  $\sigma$ , as a function of  $P_{\text{O}_2}^{-1/4}$  at  $350^\circ\text{C}$  for VSbO<sub>4</sub> (a) and VBi<sub>*x*</sub>Sb<sub>1-*x*</sub>O<sub>4</sub> mixed oxides with  $x = 0.05$  (b),  $0.08$  (c) and  $0.1$  (d).

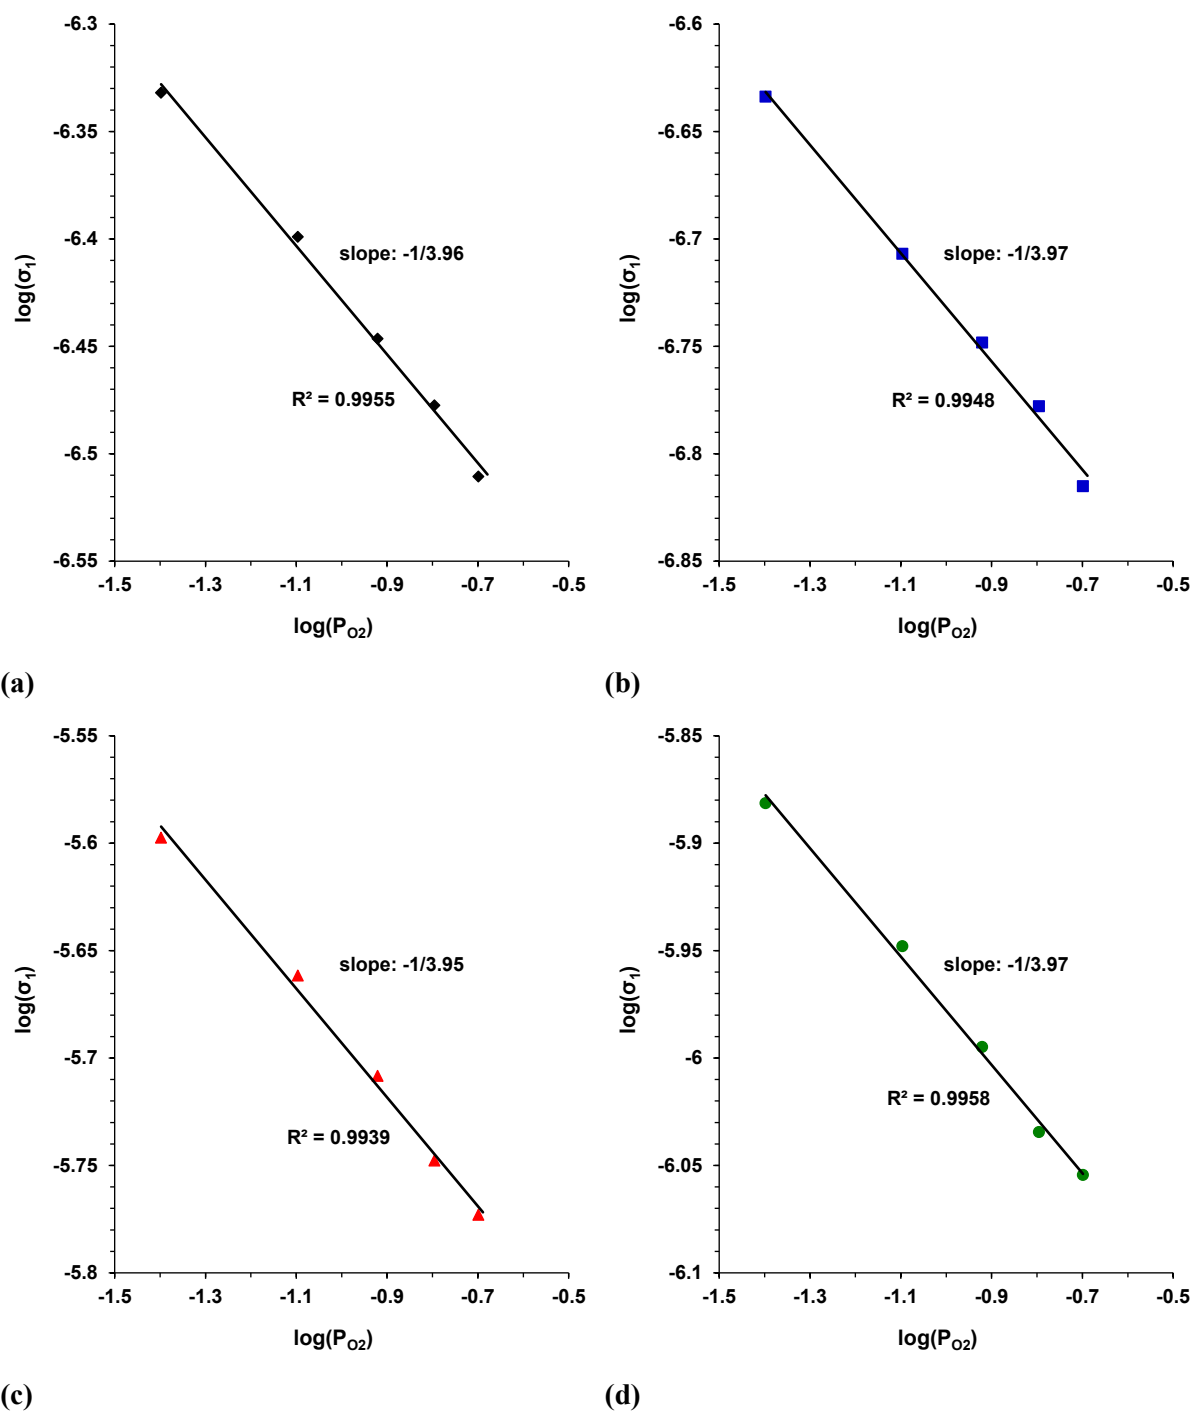

**Figure S5 :**  $\sigma_1$  conductivity as a function of the oxygen pressure in a log–log plot at 350 °C for VSbO<sub>4</sub> (a) and VBi<sub>x</sub>Sb<sub>1-x</sub>O<sub>4</sub> mixed oxides with  $x = 0.05$  (b), 0.08 (c) and 0.1 (d).

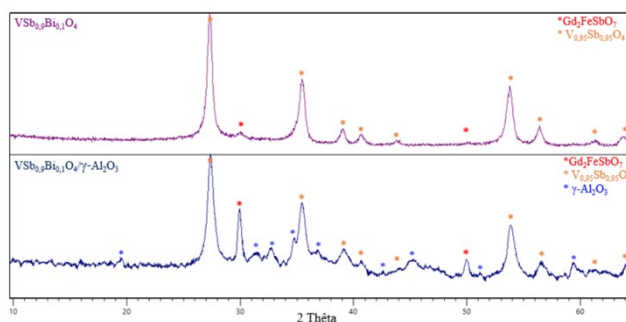

**Figure S6** : X-ray diffraction patterns of the catalysts synthesized under microwaves without ( $\text{VSb}_{0.9}\text{Bi}_{0.1}\text{O}_4$ ) and with alumina ( $\text{VSb}_{0.9}\text{Bi}_{0.1}\text{O}_4 + \text{Al}_2\text{O}_3$ ).

**Table S1**: Catalytic properties of the  $\text{VSbBiBaO}/\text{Al}_2\text{O}_3$  catalyst in the oxidation of propane. Catalyst was first tested at  $380^\circ\text{C}$  for comparison with other catalysts (Table 1) and then at  $400^\circ\text{C}$  in different conditions in order to avoid total conversion of  $\text{O}_2$ . The test was then conducted at  $350^\circ\text{C}$  in the same conditions as at  $400^\circ\text{C}$ .

| Temperature ( $^\circ\text{C}$ ) | Conv. (%)              |              | Selectivity (%)        |      |      |        |    |               | Yield (%)              |                                      |
|----------------------------------|------------------------|--------------|------------------------|------|------|--------|----|---------------|------------------------|--------------------------------------|
|                                  | $\text{C}_3\text{H}_8$ | $\text{O}_2$ | $\text{C}_3\text{H}_6$ | ACRO | ACRY | Others | CO | $\text{CO}_2$ | $\text{C}_3\text{H}_6$ | $\text{C}_3\text{H}_6 + \text{ACRO}$ |
| 350                              | 17                     | 86           | 21                     | 6    | 2    | 1      | 32 | 38            | 3.5                    | 4.6                                  |
| 380                              | 22.7                   | 97           | 16                     | 3    | 1    | -      | 42 | 48            | 3.6                    | 4.3                                  |
| 400                              | 27                     | 99           | 15                     | 4    | 2    | -      | 44 | 35            | 4.1                    | 5.1                                  |

Notes: Reaction conditions at  $350$  and  $400^\circ\text{C}$  :  $\text{C}_3\text{H}_8/\text{O}_2/10\%\text{Ne-He}$  1/1/8, Total flow =  $20 \text{ ml}\cdot\text{min}^{-1}$ , GHSV= $2000 \text{ ml}\cdot\text{g}^{-1}\cdot\text{h}^{-1}$ ; reaction conditions at  $380^\circ\text{C}$   $\text{C}_3\text{H}_8/\text{O}_2/10\%\text{Ne-He}$  10/8.7/8, Total flow= $25 \text{ ml}\cdot\text{min}^{-1}$  GHSV= $2500 \text{ ml}\cdot\text{g}^{-1}\cdot\text{h}^{-1}$ . ; ACRO : acrolein, ACRY: acrylic acid, others\* : acetic acid and acetaldehyde.
